# Supplementary material for: Influence of Non-canonical DNA Bases on the Genomic Diversity of Tevenvirinae
Source: Front Microbiol. 2021 Apr 6;12:632686. doi: 10.3389/fmicb.2021.632686 (PMC8056088; doi:10.3389/fmicb.2021.632686)
Supplement: Supplementary Table 3 — Homologs of proteins associated with non-canonical bases in the studied genomes of Tevenvirinae. [file Table_3.XLSX]

## Sheet: Лист1
phages/proteins or translated ORF		HMC-transferase	A-gt	B-gt	BA-gt	A-t	T	dCTPase — dUTPase	DenA	DenB	Alc	Arn	IpI	tORF045*	tORF047*	tORF049*	tORF050*	tORF051*	tORF053*	tORF055*	PX29p085	tAeh1ORF087c*	QueD	FolE	DpdA2	QueF	QueC	QueE
_Enterobacteria_phage_T4T_	Group I	ADJ39761.1	ADJ39777.1	ADJ39760.1				ADJ39747.1	ADJ39950.1	ADJ39995.1	ADJ39948.1	ADJ39977.1	ADJ39857.1
_Enterobacteria_phage_T4_		NP_049659.1	NP_049673.1	NP_049658.1				NP_049646.1	NP_049840.1	NP_049887.1	NP_049838.1	NP_049868.1	NP_049749.1
_Enterobacteria_phage_RB55_		AIT74957.1	AIT74973.1	AIT74956.1				AIT74943.1	AIT75136.1	AIT75182.1	AIT75134.1	AIT75163.1	AIT75051.1
_Enterobacteria_phage_RB59_		AIT75229.1	AIT75245.1	AIT75228.1				AIT75215.1	AIT75410.1	AIT75458.1	AIT75408.1	AIT75438.1	AIT75324.1
_Enterobacteria_phage_T4_strain_wild		AHY83535.1	repaired	AHY83521.1				repaired	AHY83584.1	AHY83560.1	repaired	AHY83632.1	AHY83627.1
_Escherichia_phage_vB_EcoM_G8_		QBQ79928.1	QBQ79944.1		QBQ79927.1			QBQ79915.1	AVH86057.1	QBQ80150.1	QBQ80102.1	QBQ80136.1
_Escherichia_phage_vB_EcoM_G2540-3_		QBO65456.1	QBO65474.1		QBO65454.1			QBO65441.1	QBO65634.1	QBO65685.1	QBO65632.1	QBO65665.1
_Escherichia_phage_HY03		YP_009284143.1	YP_009284128.1		YP_009284145.1			YP_009284160.1	YP_009284235.1	YP_009284193.1	YP_009284237.1	YP_009284205.1	YP_009284001.1
_Escherichia_phage_vB_EcoM_G10400		QBO63560.1	QBO63578.1		QBO63559.1			QBO63547.1	QBO63742.1	QBO63791.1	QBO63740.1	QBO63773.1	QBO63658.1
_Escherichia_phage_vB_EcoM_G4507_		QBO66011.1	QBO66029.1		QBO66010.1			QBO65998.1	QBO66195.1	QBO66239.1	QBO66193.1	QBO66224.1	QBO66110.1
_Escherichia_phage_slur03_		YP_009625203.1	YP_009625187.1		YP_009625204.1			YP_009625218.1	YP_009625024.1	YP_009624981.1	YP_009625026.1		YP_009625107.1
_Escherichia_phage_slur14_		YP_009180819.1	YP_009180835.1		YP_009180818.1			YP_009180804.1	YP_009180726.1	YP_009180769.1	YP_009180724.1		YP_009180643.1
_Escherichia_phage_slur08_		CUL02748.1	CUL02731.1		CUL02749.1			CUL02763.1	CUL02568.1	CUL02525.1	CUL02570.1		CUL02651.1
_Yersinia_phage_phiD1_		YP_009149285.1	YP_009149302.1		YP_009149284.1			YP_009149270.1	YP_009149470.1	YP_009149514.1	YP_009149468.1		YP_009149385.1
_Shigella_phage_Sf24_		YP_009619251.1	YP_009619268.1		YP_009619250.1			YP_009619237.1	YP_009619157.1	YP_009619200.1	YP_009619155.1	YP_009619184.1
_Shigella_phage_SHFML-11		YP_009277687.1	YP_009277702.1		YP_009277685.1			YP_009277672.1	YP_009277598.1	YP_009277641.1	YP_009277596.1	YP_009277627.1
_Yersinia_phage_fPS-2_		VEV89659.1	VEV89673.1		VEV89657.1			VEV89645.1	VEV89836.1	VEV89881.1	VEV89834.1	VEV89866.1	VEV89752.1
_Escherichia_phage_e112_		YP_009030651.1	YP_009030668.1		YP_009030650.1			YP_009030637.1	YP_009030834.1	YP_009030881.1	YP_009030832.1	YP_009030865.1
_Escherichia_phage_vB_EcoM_DalCa_		AYP69781.1	AYP69746.1		AYP69773.1			AYP69814.1	AYP69842.1	AYP69824.1	AYP69815.1	AYP69890.1
_Escherichia_virus_VEc20_		QDK04174.1	QDK04189.1		QDK04172.1			QDK04161.1	QDK04355.1	QDK04402.1	QDK04353.1	QDK04384.1
_Escherichia_phage_D5505_		QBO61054.1	QBO61070.1		QBO61053.1			QBO61042.1	QBO61233.1	QBO61280.1	QBO61231.1	QBO61262.1
_Escherichia_phage_vB_EcoM-fFiEco06_		AUV60906.1	AUV60922.1		AUV60905.1			AUV60892.1	AUV61088.1	AUV61134.1	AUV61086.1	AUV61114.1
_Escherichia_phage_vB_EcoM-fHoEco02_		AUV61179.1	AUV61195.1		AUV61178.1			AUV61165.1	AUV61360.1	AUV61405.1	AUV61358.1	AUV61386.1
_Escherichia_phage_CF2		repaired	repaired		repaired			repaired	repaired	repaired	repaired	repaired
_Escherichia_phage_vB_EcoM_G29_		QBO64365.1	QBO64381.1		QBO64364.1			QBO64350.1	QBO64550.1	QBO64593.1	QBO64548.1	QBO64576.1
_Escherichia_phage_vB_EcoM_G4500_		QBO65734.1	QBO65751.1		QBO65733.1			QBO65719.1	QBO65922.1	QBO65965.1	QBO65920.1	QBO65948.1
_Escherichia_phage_vB_EcoM_G9062_		QBQ77827.1	QBQ77845.1		QBQ77826.1			QBQ77813.1	QBQ78010.1	QBQ78056.1	QBQ78008.1	QBQ78037.1
_Escherichia_phage_vB_EcoM_JB75_		AXC34043.1	AXC34005.1		AXC34032.1			AXC34077.1	AXC34104.1	AXC34086.1	AXC34078.1	AXC34152.1
_Enterobacteria_phage_vB_EcoM_ACG-C40_		YP_006986595.1	YP_006986613.1		YP_006986593.1			YP_006986580.1	YP_006986782.1	YP_006986830.1	YP_006986780.1	YP_006986811.1
_Escherichia_phage_vB_EcoM_OE5505_		QBQ79370.1	QBQ79388.1		QBQ79368.1			QBQ79355.1	QBQ79557.1	QBQ79603.1	QBQ79555.1	QBQ79583.1
_Enterobacteria_phage_Kha5h		ANZ51686.1	ANZ51702.1		ANZ51685.1			ANZ51673.1	ANZ51843.1	ANZ51645.1	ANZ51841.1	ANZ51629.1	ANZ51767.1
_Escherichia_phage_PE37		ANH49819.1	ANH49803.1		ANH49821.1			ANH49834.1	ANH49643.1	ANH49865.1	ANH49645.1	ANH49616.1	ANH49724.1
_Escherichia_phage_HY01		YP_009148491.1	YP_009148507.1		YP_009148490.1			YP_009148480.1	YP_009148667.1	YP_009148703.1	YP_009148665.1	YP_009148693.1	YP_009148583.1
_Enterobacteria_phage_Aplg8		ANZ50897.1	ANZ50914.1		NZ50896.1			ANZ50885.1	ANZ50818.1	ANZ50855.1	ANZ50816.1		ANZ50743.1
_Escherichia_phage_slur02		YP_009210235.1	YP_009210250.1		YP_009210234.1			YP_009210222.1	YP_009210146.1	YP_009210189.1	YP_009210144.1	YP_009210173.1
_Enterobacteria_phage_GiZh		ANZ51485.1	ANZ51502.1		ANZ51484.1			ANZ51473.1	ANZ51405.1	ANZ51444.1	ANZ51403.1	ANZ51428.1
_Escherichia_phage_vB_EcoM_G4498		QBO64084.1	QBO64101.1		QBO64082.1			QBO64069.1	QBO64271.1	QBO64317.1	QBO64269.1	QBO64297.1
_Escherichia_phage_slur07		YP_009197408.1	YP_009197391.1		YP_009197409.1			YP_009197420.1	YP_009197229.1	YP_009197454.1	YP_009197231.1	YP_009197204.1
_Enterobacteria_phage_T6		AXN58084.1	AXN58099.1		AXN58083.1			AXN58072.1	AXN58261.1	AXN58305.1	AXN58259.1	AXN58288.1
_Escherichia_phage_vB_EcoM_G2540		QBO63287.1	QBO63305.1	QBO63285.1	QBO63286.1			QBO63271.1	QBO63465.1	QBO63513.1	QBO63463.1		QBO63380.1
_Escherichia_phage_vB_EcoM_KAW1E185_		QBQ78328.1	QBQ78346.1		QBQ78327.1			QBQ78315.1	QBQ78511.1	QBQ78555.1	QBQ78509.1	QBQ78538.1	QBQ78429.1
_Escherichia_phage_vB_EcoM_R5505_		QBQ79651.1	QBQ79669.1		QBQ79650.1			QBQ79638.1	QBQ79839.1	QBQ79882.1	QBQ79837.1	QBQ79865.1	QBQ79754.1
_Shigella_phage_SHBML-50-1_		YP_009288412.1	YP_009288429.1		YP_009288411.1			YP_009288399.1	YP_009288590.1	YP_009288631.1	YP_009288588.1	YP_009288616.1
_Shigella_phage_Sf22_		YP_009614968.1	YP_009614983.1		YP_009614967.1			YP_009614955.1	YP_009614877.1	YP_009614921.1	YP_009614875.1	YP_009614904.1	YP_009614794.1
_Enterobacteria_phage_RB18_		AXF42353.1	AXF42369.1		AXF42352.1			AXF42340.1	AXF42535.1	AXF42579.1	AXF42533.1	AXF42562.1
_Escherichia_phage_UFV-AREG1_		YP_009281383.1	YP_009281400.1		YP_009281382.1			YP_009281371.1	YP_009281559.1	YP_009281603.1	YP_009281557.1	YP_009281588.1	YP_009281477.1
_Yersinia_phage_PST_		YP_009153644.1	YP_009153660.1		YP_009153643.1			YP_009153632.1	YP_009153826.1	YP_009153872.1	YP_009153824.1	YP_009153855.1
_Enterobacteria_phage_vB_EcoM_IME340_		AWD91889.1	YP_009281400.1		AWD91890.1			AWD91902.1	AWD91711.1	AWD91672.1	AWD91713.1	AWD91685.1
_Escherichia_phage_vB_EcoM-UFV13_		YP_009290312.1	YP_009290328.1		YP_009290311.1			YP_009290298.1	YP_009290491.1	YP_009290532.1	YP_009290489.1	YP_009290516.1	YP_009290410.1
_Escherichia_phage_ECML-134_		YP_009102518.1	YP_009102534.1		YP_009102517.1			YP_009102506.1	YP_009102699.1	YP_009102743.1	YP_009102697.1	YP_009102726.1	YP_009102613.1
_Shigella_phage_Shfl2_		YP_004414945.1	YP_004414960.1		YP_004414944.1			YP_004414931.1	YP_004415120.1	YP_004415162.1	YP_004415118.1	YP_004415145.1
_Escherichia_phage_slur04_		YP_009625266.1	YP_009625281.1		YP_009625265.1			YP_009625253.1	YP_009625443.1	YP_009625486.1	YP_009625441.1	YP_009625470.1
_Escherichia_phage_slur11_		CUL02820.1	CUL02835.1		CUL02819.1			CUL02807.1	CUL02997.1	CUL03040.1	CUL02995.1	CUL03024.1
_Escherichia_phage_slur13_		CUL03606.1	CUL03621.1		CUL03605.1			CUL03593.1	CUL03783.1	CUL03560.1	CUL03781.1	CUL03544.1
_Escherichia_phage_PP01		BBC14380.1	BBC14397.1		BBC14379.1			BBC14367.1	BBC14569.1	BBC14613.1	BBC14567.1	BBC14593.1
_Escherichia_phage_T2		BBC14658.1	BBC14676.1		BBC14657.1			BBC14645.1	BBC14845.1	BBC14889.1	BBC14843.1	BBC14869.1
_Shigella_phage_SH7_		APC45056.1	APC45118.1		APC45101.1			APC45039.1	APC45119.1	APC45080.1	APC45027.1	APC45030.1	APC45032.1
_Enterobacteria_phage_AR1_DNA_		YP_009167856.1	YP_009167872.1		YP_009167855.1			YP_009167843.1	YP_009168047.1	YP_009168090.1	YP_009168045.1	YP_009168074.1
_Escherichia_phage_KIT03_DNA_		BBG28565.1	BBG28582.1		BBG28564.1			BBG28552.1	BBG28743.1	BBG28785.1	BBG28741.1	BBG28769.1
_Enterobacteria_phage_vB_EcoM_IME339_		AWD91627.1	AWD91613.1		AWD91628.1			AWD91639.1	AWD91455.1	AWD91417.1	AWD91457.1	AWD91431.1	AWD91538.1
_Shigella_phage_Sf21_		YP_009618857.1	YP_009618872.1		YP_009618856.1			YP_009618844.1	YP_009619034.1	YP_009619077.1	YP_009619032.1	YP_009619060.1
_Enterobacteria_phage_RB10_		AIT74138.1	AIT74154.1		AIT74137.1			AIT74126.1	AIT74317.1	AIT74365.1	AIT74315.1	AIT74346.1	AIT74234.1
_Enterobacteria_phage_RB3_		YP_009098429.1	YP_009098445.1		YP_009098428.1			YP_009098417.1	YP_009098609.1	YP_009098657.1	YP_009098607.1	YP_009098638.1	YP_009098525.1
_Enterobacteria_phage_RB5_		AIT73052.1	AIT73068.1		AIT73051.1			AIT73040.1	AIT73230.1	AIT73278.1	AIT73228.1	AIT73259.1	AIT73147.1
_Enterobacteria_phage_RB6_		AIT73323.1	AIT73339.1		AIT73322.1			AIT73311.1	AIT73501.1	AIT73549.1	AIT73499.1	AIT73530.1	AIT73418.1
_Enterobacteria_phage_RB7_		AIT73594.1	AIT73610.1		AIT73593.1			AIT73582.1	AIT73772.1	AIT73821.1	AIT73770.1	AIT73801.1	AIT73689.1
_Enterobacteria_phage_RB9		AIT73866.1	AIT73882.1		AIT73865.1			AIT73854.1	AIT74044.1	AIT74093.1	AIT74042.1	AIT74073.1	AIT73961.1
_Escherichia_phage_vB_EcoM-G28		AVH85879.1	AVH85896.1		AVH85877.1			AVH85863.1	AVH86057.1	AVH86099.1	AVH86053.1	AVH86084.1	AVH85971.1
_Enterobacteria_phage_RB27_		YP_009102249.1	YP_009102266.1		YP_009102248.1			YP_009102236.1	YP_009102427.1	YP_009102474.1	YP_009102425.1	YP_009102454.1	YP_009102346.1
_Bacteriophage_RB32_		YP_802984.1	YP_803002.1		YP_802983.1			YP_802971.1	YP_803165.1	YP_803209.1	YP_803163.1	YP_803190.1
_Enterobacteria_phage_RB33_		AIT74681.1	AIT74699.1		AIT74680.1			AIT74668.1	AIT74862.1	AIT74909.1	AIT74860.1	AIT74887.1
_Enterobacteria_phage_RB14_		YP_002854378.1	YP_002854395.1		YP_002854377.1			YP_002854366.1	YP_002854561.1	YP_002854607.1	YP_002854559.1	YP_002854586.1	YP_002854476.1
_Escherichia_phage_vB_EcoM_G50_		QBO64918.1	QBO64934.1		QBO64917.1			QBO64905.1	QBO65096.1	QBO65139.1	QBO65094.1	QBO65123.1	QBO65013.1
_Shigella_phage_pSs-1_		YP_009110863.1	YP_009110878.1		YP_009110862.1			YP_009110851.1	YP_009111043.1	YP_009110819.1	YP_009111041.1	YP_009111068.1
_Enterobacteria_phage_RB51_		ACP30962.1	ACP30981.1		ACP30961.1			ACP30949.1	ACP31144.1	ACP31189.1	ACP31142.1	ACP31171.1
_Enterobacteria_phage_RB68_		AIT75504.1	AIT75523.1		AIT75503.1			AIT75491.1	AIT75686.1	AIT75734.1	AIT75684.1	AIT75713.1
_Escherichia_phage_wV7_		YP_007004786.1	YP_007004802.1		AIT75503.1			YP_007004773.1	YP_007004967.1	YP_007005012.1	YP_007004965.1	YP_007004994.1
_Shigella_phage_Sf23_		ATE86575.1	ATE86592.1		ATE86574.1			ATE86562.1	ATE86484.1	ATE86527.1	ATE86482.1	ATE86511.1
_Escherichia_phage_vB_EcoM-Sa45lw_		QDF15069.1	QDF15086.1		QDF15068.1			QDF15056.1	QDF15250.1	QDF15293.1	QDF15248.1	QDF15277.1
_Escherichia_virus_vB_Eco_mar005P1_	Group II	VCU44610.1				VCU44569.1		VCU44592.1	VCU44528.1	VCU44564.1	VCU44526.1		VCU44374.1	VCU44608.1	VCU44609.1	VCU44611.1	VCU44612.1	VCU44613.1	VCU44614.1	VCU44616.1
_Escherichia_virus_vB_Eco_mar005P1_strain_vB_Eco_mar009P5_		VCU44958.1				VCU44732.1		VCU44709.1	VCU44773.1	VCU44737.1	VCU44775.1		VCU44854.1	VCU44960.1	VCU44959.1	VCU44957.1	VCU44956.1	VCU44955.1	VCU44954.1	VCU44952.1
_Escherichia_virus_vB_Eco_mar005P1_strain_vB_Eco_mar008P4_		VCU44097.1				VCU44049.1		VCU44079.1	VCU44008.1	VCU44044.1	VCU44006.1		VCU43927.1	VCU44095.1	VCU44096.1	VCU44098.1	VCU44099.1	VCU44100.1	VCU44101.1	VCU44103.1
_Escherichia_virus_vB_Eco_mar005P1_strain_vB_Eco_mar006P2_		VCU44253.1				VCU44212.1		VCU44235.1	VCU44152.1	VCU44207.1	VCU44148.1		VCU44383.1	VCU44251.1	VCU44252.1	VCU44254.1	VCU44255.1	VCU44256.1	VCU44257.1	VCU44259.1
_Escherichia_virus_vB_Eco_mar005P1_strain_vB_Eco_mar007P3_		VCU43382.1				VCU43341.1		VCU43364.1	VCU43300.1	VCU43336.1	VCU43298.1		VCU43219.1	VCU43380.1	VCU43381.1	VCU43383.1	VCU43384.1	VCU43385.1	VCU43386.1	VCU43388.1
_Escherichia_phage_vB_EcoM_G53_		QBO65185.1				QBO65144.1		QBO65167.1	QBO65373.1	QBO65410.1	QBO65371.1		QBO65290.1	QBO65183.1	QBO65184.1	QBO65186.1	QBO65187.1	QBO65188.1	QBO65189.1	QBO65190.1
_Escherichia_phage_ST0		YP_009608359.1				YP_009608399.1		YP_009608377.1	YP_009608439.1	YP_009608404.1	YP_009608441.1			YP_009608361.1	YP_009608360.1	YP_009608358.1	YP_009608357.1	YP_009608356.1	YP_009608355.1	YP_009608353.1
_Escherichia_phage_vB_EcoM_JS09_		YP_009037459.1				YP_009037500.1		YP_009037477.1	YP_009037541.1	YP_009037505.1	YP_009037543.1		YP_009037352.1	YP_009037461.1	YP_009037460.1	YP_009037458.1	YP_009037457.1	YP_009037456.1	YP_009037455.1	YP_009037454.1
_Enterobacteria_phage_HX01		repaired				repaired		repaired	repaired	repaired	repaired		repaired	repaired	repaired	repaired	repaired	repaired	repaired	repaired
_Escherichia_coli_O157_typing_phage_3_		YP_009592919.1				YP_009592961.1		YP_009592936.1	YP_009592731.1	YP_009592966.1	YP_009592733.1		YP_009592814.1	YP_009592921	YP_009592920.1	YP_009592918.1	YP_009592917.1	YP_009592916.1	YP_009592915.1	YP_009592913.1
_Escherichia_coli_O157_typing_phage_6_		YP_009593056.1				YP_009593014.1		YP_009593039.1	YP_009593225.1	YP_009593009.1	YP_009593223.1		YP_009593142.1	YP_009593054.1	YP_009593055.1	YP_009593057.1	YP_009593058.1	YP_009593059.1	YP_009593060.1	YP_009593062.1
_Escherichia_phage_APCEc01_		YP_009225217.1				YP_009224986.1		YP_009224963.1	YP_009225028.1	YP_009224991.1	YP_009225030.1		YP_009225111.1	YP_009225219.1	YP_009225218.1	YP_009225216.1	YP_009225215.1	YP_009225214.1	YP_009225213.1	YP_009225211.1
_Escherichia_phage_vB_EcoM_MM02_		QBQ79094.1				QBQ79053.1		QBQ79076.1	QBQ79286.1	QBQ79322.1	QBQ79284.1		QBQ79203.1	QBQ79092.1	QBQ79093.1	QBQ79095.1	QBQ79096.1	QBQ79097.1	QBQ79098.1	QBQ79100.1
_Escherichia_phage_vB_EcoM_WFK_		QBQ77069.1				QBQ77028.1		QBQ77051.1	QBQ77246.1	QBQ77285.1	QBQ77244.1		QBQ77164.1	QBQ77067.1	QBQ77068.1	QBQ77070.1	QBQ77071.1	QBQ77072.1	QBQ77073.1	QBQ77075.1
_Escherichia_phage_vB_EcoM_WFL6982_		QBQ76808.1				QBQ76767.1		QBQ76790.1	QBQ76985.1	QBQ77023.1	QBQ76983.1		QBQ76903.1	QBQ76806.1	QBQ76807.1	QBQ76809.1	QBQ76810.1	QBQ76811.1	QBQ76812.1	QBQ76814.1
_Escherichia_phage_vB_EcoM_WFbE185		QBQ77549.1				QBQ77508.1		QBQ77531.1	QBQ77740.1	QBQ77780.1	QBQ77738.1		QBQ77656.1	QBQ77547.1	QBQ77548.1	QBQ77550.1	QBQ77551.1	QBQ77552.1	QBQ77553.1	QBQ77556.1
_Escherichia_phage_vB_EcoM_G2285		QBO62475.1				QBO62435.1		QBO62458.1	QBO62655.1	QBO62692.1	QBO62653.1			QBO62473.1	QBO62474.1	QBO62476.1	QBO62477.1	QBO62478.1	QBO62479.1	QBO62481.1
_Escherichia_phage_vB_EcoM_G2469		QBO62738.1				QBO62697.1		QBO62720.1	QBO62926.1	QBO62963.1	QBO62924.1			QBO62736.1	QBO62737.1	QBO62739.1	QBO62740.1	QBO62741.1	QBO62742.1	QBO62744.1
_Escherichia_phage_vB_EcoM_KAW3E185		QBQ78603.1				QBQ78560.1		QBQ78585.1	QBQ78789.1	repaired	QBQ78787.1		QBQ78704.1	QBQ78601.1	QBQ78602.1	QBQ78604.1	QBQ78605.1	QBQ78606.1	QBQ78607.1	QBQ78609.1
_Shigella_phage_SHSML-52-1		YP_009288973.1				YP_009289016.1		YP_009288991.1	YP_009289057.1	YP_009289021.1	YP_009289059.1		YP_009289139.1	YP_009288975.1	YP_009288974.1	YP_009288972.1	YP_009288971.1	YP_009288970.1	YP_009288969.1	YP_009288967.1
_Enterobacteria_phage_ATK47		ANZ51128.1				ANZ50950.1		ANZ51141.1	ANZ50987.1	ANZ50955.1	ANZ50989.1		ANZ51053.1	ANZ51129.1	repaired	ANZ51127.1	ANZ51126.1	ANZ51125.1	repaired	ANZ51125.1
_Enterobacteria_phage_ATK48		ANZ51259.1				ANZ51292.1		ANZ51273.1	ANZ51329.1	ANZ51297.1	ANZ51331.1		ANZ51177.1	ANZ51260.1	repaired	ANZ51258.1	ANZ51257.1	ANZ51256.1	repaired	ANZ51256.1
_Escherichia_phage_p000y		AYN56557.1				AYN56599.1		AYN56574.1	AYN56639.1	AYN56604.1	AYN56641.1		AYN56455.1	AYN56559.1	AYN56558.1	AYN56556.1	AYN56555.1	AYN56554.1	AYN56553.1	AYN56554.1
_Escherichia_phage_HP3		repaired				repaired		repaired	repaired	repaired	repaired		repaired	repaired	repaired	repared	repaired	repaired	repaired	repaired
_Escherichia_phage_vB_EcoM_PhAPEC2		YP_009056633.1				YP_009056595.1		YP_009056617.1	YP_009056810.1	YP_009056844.1	YP_009056808.1		YP_009056732.1	YP_009056631.1	YP_009056632.1	YP_009056634.1	YP_009056635.1	YP_009056636.1	YP_009056637.1	YP_009056636.1
_Escherichia_phage_SF		AWY07953.1				AWY07993.1		AWY07970.1	AWY07771.1	AWY07998.1	AWY07773.1			AWY07955.1	AWY07954.1	repaired	AWY07952.1	AWY07951.1	AWY07950.1	AWY07951.1
_Enterobacteria_phage_RB69_		NP_861738.1				NP_861693.1		NP_861718.1	NP_861927.1	NP_861961.1	NP_861925.1		NP_861845.1	NP_861735.1	NP_861737.1	NP_861739.1	NP_861740.1	NP_861741.1	NP_861742.1	NP_861745.1
_Escherichia_phage_p000v_		AYN56373.1				AYN56413.1		AYN56390.1	AYN56189.1	AYN56418.1	AYN56191.1			AYN56375.1	AYN56374.1	AYN56372.1	AYN56371.1	AYN56370.1	AYN56369.1	AYN56367.1
_Escherichia_phage_OLB35_		AYR03955.1				AYR03914.1		AYR03938.1	AYR04143.1	AYR04181.1	AYR04141.1		AYR04061.1	AYR03953.1	AYR03954.1	AYR03956.1	AYR03958.1	AYR03959.1	AYR03960.1	AYR03962.1
_Enterobacteria_phage_Bp7_	Group III	YP_007004135.1						YP_007004151.1	YP_007004221.1	YP_007004181.1	frameshift		YP_007004304.1	YP_007004134.1	YP_007004136.1			YP_007004133.1	YP_007004132.1
_Escherichia_phage_WG01_		YP_009323242.1						YP_009323227.1	YP_009323431.1	YP_009323469.1	YP_009323429.1			YP_009323243.1	YP_009323241.1			YP_009323244.1	YP_009323245.1
_Enterobacteria_phage_QL01		YP_009202773.1						YP_009202758.1	YP_009202964.1	YP_009203003.1	YP_009202962.1			YP_009202774.1	YP_009202772.1			YP_009202775.1	YP_009202776.1
_Escherichia_phage_AnYang		QAU03745.1						QAU03733.1	QAU03676.1	QAU03707.1	QAU03675.1			QAU03746.1	QAU03744.1			QAU03747.1	QAU03748.1
_Escherichia_phage_MX01		YP_009323938.1						YP_009323923.1	YP_009324123.1	YP_009324160.1	YP_009324121.1			YP_009323939.1	YP_009323937.1			YP_009323940.1	YP_009323941.1
_Escherichia_phage_EcWhh-1		QAY00070.1						QAY00055.1	QAX99982.1	QAY00023.1	QAX99980.1			QAY00071.1	QAY00069.1			QAY00072.1	QAY00073.1
_Phage_NC-G		QBP35656.1						QBP35640.1	QBP35571.1	QBP35609.1	QBP35569.1			QBP35657.1	QBP35655.1			QBP35658.1	QBP35659.1
_Enterobacteria_phage_JS10_		YP_002922388.1						YP_002922375.1	YP_002922569.1	YP_002922611.1	YP_002922567.1			YP_002922389.1	YP_002922387.1			YP_009037456.1	YP_002922391.1
_Enterobacteria_phage_JS98		YP_001595168.1						YP_001595154.1	YP_001595351.1	YP_001595392.1	YP_001595349.1			YP_001595169.1	YP_001595167.1			YP_001595170.1	YP_001595171.1
_Enterobacteria_phage_IME08_		YP_003734190.1						YP_003734175.1	YP_003734367.1	YP_003734401.1	YP_003734365.1			YP_003734191.1	YP_003734189.1			YP_003734192.1	YP_003734193.1
_Enterobacteria_phage_vB_EcoM_VR5		YP_009205737.1						YP_009205721.1	YP_009205924.1	frameshift**	YP_009205922.1			YP_009205738.1	YP_009205736.1			YP_009205739.1	YP_009205740.1
_Enterobacteria_phage_vB_EcoM-VR7_								YP_004063713.1	YP_004063926.1	YP_004063970.1	YP_004063923.1
_Enterobacteria_phage_vB_EcoM_VR26_								YP_009213867.1	YP_009214079.1	YP_009214125.1	YP_009214076.1
_Enterobacteria_phage_vB_EcoM_VR25_								YP_009209772.1	YP_009209987.1	YP_009210032.1	YP_009209984.1
_Shigella_phage_SP18								YP_003934655.1	YP_003934866.1	YP_003934906.1	YP_003934863.1
_Enterobacteria_phage_vB_EcoM_VR20								YP_009207207.1	YP_009207418.1	YP_009207462.1	YP_009207415.1
_Klebsiella_phage_Marfa	Group IV	QDB71694.1						QDB71680.1	QDB71888.1	QDB71931.1	QDB71886.1			QDB71696.1	QDB71693.1		QDB71695.1	QDB71697.1	QDB71698.1
_Klebsiella_phage_vB_Kpn_F48		AUO78722.1						AUO78734.1	AUO78805.1	AUO78761.1	AUO78807.1			AUO78719.1	AUO78723.1		AUO78720.1	AUO78718.1	AUO78716.1
_Pectobacterium_bacteriophage_PM2	Group V	YP_009211464.1						YP_009211450.1	YP_009211669.1	YP_009211710.1	YP_009211666.1			YP_009211462.1	YP_009211463.1	YP_009211466.1	AYR03958.1	YP_009211468.1	YP_009211469.1	YP_009211471.1
_Salmonella_phage_STP4-a	Group VI	YP_009126245.1		YP_009126243.1	YP_009126244.1			YP_009126232.1	YP_009126166.1	YP_009126207.1	YP_009126164.1
_Salmonella_phage_vB_SnwM_CGG4-1		YP_009286403.1		YP_009286401.1	YP_009286402.1			YP_009286391.1	YP_009286578.1	YP_009286623.1	YP_009286576.1
_Salmonella_phage_S16_		YP_007501078.1		YP_007501076.1	YP_007501077.1			YP_007501065.1	YP_007501257.1	YP_007501306.1	YP_007501255.1
_Salmonella_phage_Melville_		YP_009615521.1		YP_009615519.1	YP_009615520.1			YP_009615509.1	YP_009615702.1	YP_009615748.1	YP_009615700.1
_Salmonella_phage_STML-198		YP_009148030.1		YP_009148028.1	YP_009148029.1			YP_009148018.1	YP_009147950.1	YP_009147990.1	YP_009147948.1
_Citrobacter_phage_Merlin_	Group VII	YP_009203758.1		YP_009203756.1	YP_009203757.1			YP_009203745.1	YP_009203967.1	YP_009204014.1	YP_009203964.1
_Citrobacter_phage_Moon		YP_009146479.1		YP_009146477.1	YP_009146478.1			YP_009146464.1	YP_009146680.1	YP_009146728.1	YP_009146677.1
_Cronobacter_phage_Pet-CM3-4	Group VIII	SCN45730.1		SCN45728.1	SCN45729.1			SCN45718.1	SCN45924.1	SCN45970.1	SCN45922.1
_Enterobacteria_phage_CC31		YP_004009899.1		YP_004009897.1	YP_004009898.1			YP_004009885.1	YP_004010090.1	YP_004010135.1	YP_004010088.1
_Enterobacter_phage_PG7_		YP_009005304.1		YP_009005302.1	YP_009005303.1			YP_009005291.1	YP_009005510.1	YP_009005556.1	YP_009005508.1
_Enterobacter_phage_myPSH1140		AVR55242.1		AVR55240.1	AVR55241.1			AVR55230.1	AVR55412.1	repaired	AVR55410.1
_Klebsiella_phage_PKO111	Group IX	YP_009289506.1	YP_009289494.1		YP_009289507.1			YP_009289517.1	YP_009289564.1	YP_009289534.1	YP_009289566.1
_Klebsiella_phage_vB_KpnM_KpV477_		YP_009288718.1	YP_009288730.1		YP_009288717.1			YP_009288701.1	YP_009288911.1	YP_009288950.1	YP_009288909.1
_Klebsiella_phage_KPV15_		APD20416.1	YP_009288730.1		APD20415.1			APD20405.1	APD20630.1	APD20378.1	APD20628.1
_Klebsiella_phage_KP1_		AUV57380.1	AUV57393.1		AUV57379.1			AUV57368.1	AUV57576.1	AUV57621.1	AUV57573.1
_Klebsiella_phage_Mineola_		AWY06933.1	AWY06945.1		AWY06932.1			AWY06921.1	AWY07127.1	AWY07170.1	AWY07125.1
_Erwinia_phage_Cronus	Group X	AWD90475.1	AWD90486.1					AWD90460.1	AWD90391.1	AWD90438.1	AWD90387.1
_Pseudomonas_phage_PspYZU05	Group XI	ASD52025.1						ASD52014.1	ASD51965.1					ASD52023.1	ASD52024.1			ASD52026.1	ASD52027.1	ASD52028.1
_Serratia_phage_PS2	Group XII	YP_009030090.1		YP_009030087.1	YP_009030088.1			YP_009030073.1	YP_009030283.1	YP_009030318.1	YP_009030281.1				YP_009030089.1
_Acinetobacter_phage_AM101	Group XIII	AWY10354.1				AWY10357.1	AWY10433.1	AWY10381.1		AWY10438.1	AWY10219.1			AWY10356.1	AWY10355.1			AWY10353.1	AWY10352.1	AWY10351.1
_Acinetobacter_phage_vB_ApiM_fHyAci03		AXF40647.1				AXF40644.1	AXF40643.1	AXF40618.1		AXF40815.1	AXF40785.1			AXF40645.1	AXF40646.1			AXF40648.1	AXF40649.1	AXF40650.1
_Acinetobacter_phage_KARL-1		AXY82824.1				AXY82827.1	AXY82828.1	AXY82855.1		AXY82650.1	AXY82683.1			AXY82826.1	AXY82825.1			AXY82823.1	AXY82822.1	AXY82821.1
_Acinetobacter_phage_ZZ1								YP_006488935.1		YP_006489012.1	YP_006489058.1
_Acinetobacter_phage_Acj61		YP_004009697.1				YP_004009694.1	YP_004009693.1	YP_004009666.1		YP_004009857.1				YP_004009695.1	YP_004009696.1			YP_004009698.1	YP_004009700.1	YP_004009701.1
_Acinetobacter_phage_Acj9		YP_004010226.1				YP_004010217.1		YP_004010190.1		YP_004010389.1	YP_004010359.1			YP_004010224.1	YP_004010225.1			YP_004010220.1	YP_004010221.1	YP_004010222.1
_Acinetobacter_phage_133								YP_004300618.1		YP_004300837.1	YP_004300804.
_Acinetobacter_phage_Ac42		YP_004009439.1						YP_004009412.1		YP_004009616.1	YP_004009582.1			YP_004009437.1	YP_004009438.1				YP_004009445.1	ADI96322.1
_Proteus_phage_phiP4-3	Group XIV	AUM58596.1						AUM58611.1	AUM58398.1	AUM58359.1	AUM58400.1			AUM58590.1	AUM58597.1		AUM58592.1	AUM58589.1	AUM58588.1	AUM58587.1
_Proteus_phage_vB_PmiM_Pm5461		YP_009195453.1						YP_009195437.1	YP_009195638.1	YP_009195673.1	YP_009195636.1			YP_009195458.1	YP_009195452.1		YP_009195456.1	YP_009195459.1	YP_009195460.1
_Morganella_phage_vB_MmoM_MP1								YP_009279873.1	YP_009280090.1	YP_009280126.1	YP_009280088.1			YP_009279888.1
_Escherichia_phage_vB_EcoM_G2494	Group XV							QBO62981.1	QBO63190.1
_Escherichia_phage_vB_EcoM_G5211								QBO66259.1	QBO66460.1
_Escherichia_virus_KFS-EC								AXF53322.1	AXF53260.1
_Escherichia_phage_vB_EcoM_G37-3								QBO64614.1	QBO64824.1
_Escherichia_phage_ECD7								QBO66259.1	YP_009602185.1
_Escherichia_phage_vB_EcoM_G2248								QBO62172.1	QBO62381.1
_Enterobacteria_phage_JSE_								YP_002922088.1	YP_002922303.1
_Enterobacteria_phage_GEC-3S_								YP_009118699.1	YP_009118909.1
_Enterobacteria_phage_Phi1_								YP_001469359.1	YP_001469568.1
_Enterobacteria_phage_RB49_								NP_891586.1	NP_891795.1
_Shigella_phage_Sf20_								AUV63976.1	AUV63912.1
_Citrobacter_phage_IME-CF2	Group XVI							YP_009218705.1	YP_009218669.1
_Citrobacter_phage_Miller								YP_009097629.1	YP_009097669.1
_Enterobacteria_phage_RB43								YP_239002.1	YP_239043.1
_Enterobacteria_phage_RB16								YP_003858325.1	YP_003858367.1
_Citrobacter_phage_vB_CfrM_CfP1_								YP_009285565.1	YP_009285604.1
_Escherichia_phage_Lw1_								YP_008060550.1	YP_008060592.1
_Cronobacter_phage_vB_CsaM_GAP161_								YP_006986300.1	YP_006986343.1
_Cronobacter_phage_vB_CsaM_leB_								AOG16154.1	AOG16194.1
_Cronobacter_phage_vB_CsaM_leN_								AOG16433.1	AOG16474.1
_Citrobacter_phage_Margaery_								YP_009194845.1	YP_009194884.1
_Citrobacter_phage_Maroon_								AYJ72890.1	AYJ72929.1
_Klebsiella_phage_Matisse_								YP_009194269.1	YP_009194312.1
_Klebsiella_phage_Miro_								YP_009607221.1	YP_009607263.1
_Enterobacter_phage_phiEap-3_								YP_009606941.1	YP_009606982.1
_Aeromonas_phage_AS-szw	Clade XVII								ATI17584.1		ATI17517.1
_Aeromonas_phage_AS-zj									ASU00413.1		ASU00479.1
_Aeromonas_phage_Asswx_1									QAX98023.1		QAX97957.1
_Aeromonas_phage_CC2									YP_007010175.1		YP_007010243.1
_Aeromonas_phage_65.2									APU01712.1		APU01786.1											APU01513.1
_Aeromonas_phage_65									YP_004301180.1		YP_004301259.1											YP_004300965.1
_Aeromonas_phage_Aswh_1									QAY01118.1		QAY01187.1
_Aeromonas_phage_AsFcp_2	Group XVIII								QAX98553.1												QAX98348.1
_Aeromonas_phage_PX29									YP_009011727.1												YP_009011514.1
_Aeromonas_phage_Aeh1_									NP_944198.1													NP_943971.1
_Vibrio_phage_KVP40	Group XIX										NP_899308.1												NP_899368.1	NP_899369.1	NP_899370.1	NP_899371.1	NP_899372.1	NP_899531.1
_Vibriophage_phi-pp2											AFN37291.1												AFN37350.1	AFN37351.1	AFN37353.1	AFN37354.1	AFN37355.1	AFN37515.1
_Vibrio_phage_phi-ST2											ALP47482.1												ALP47397.1	ALP47437.1	ALP47368.1	ALP47403.1	ALP47426.1	ALP47407.1
_Vibrio_phage_ValB1_HC											QBX06028.1												QBX05969.1	QBX05968.1	QBX05967.1	QBX05966.1	QBX05965.1	QBX06188.1
_Vibrio_phage_phi-Grn1											ALP47101.1												ALP47016.1	ALP47057.1	ALP46987.1	ALP47024.1	ALP47049.1	ALP47028.1
_Vibrio_phage_ValKK3											YP_009201304.1												YP_009201243.1	YP_009201242.1	YP_009201241.1	YP_009201240.1	YP_009201239.1	YP_009201467.1
_Vibrio_phage_vB_VmeM-32	Group XX								ALY07153.1												ALY07058.1
repaired - the sequences were restored after re-annotation
fraimshift - the sequences were not annotated correctly due to a shift of ORF
t - translated ORF
A-gt - α glucosyl transferase
B-gt - β glucosyl transferase
Bα-gt - β-1, 6-glucosyl-α- glucose transferase
A-t - arabinosyl transferase
T - putative transferase, arabinosyl transferase paralogs
